# Supplementary material for: Counter Anion Effect on the Photophysical Properties of Emissive Indolizine-Cyanine Dyes in Solution and Solid State
Source: Molecules. 2018 Nov 22;23(12):3051. doi: 10.3390/molecules23123051 (PMC6321477; doi:10.3390/molecules23123051)
Supplement: Supplementary file 1 [file molecules-23-03051-s001.pdf]

# **Counter Anion Effect on the Photophysical Properties of Emissive Indolizine-Cyanine Dyes in Solution and Solid State**

Jacqueline N. Gayton,<sup>a,†</sup> Shane Autry,<sup>a,†</sup> Ryan C. Fortenberry,<sup>a</sup> Nathan I. Hammer,<sup>a</sup> and Jared H. Delcamp<sup>\*,a</sup>

<sup>a</sup> Department of Chemistry and Biochemistry, University of Mississippi, University, MS, 38677

<sup>†</sup> These authors contributed equally.

\* email: delcamp@olemiss.edu

# Table of Contents

## 1. Computational Data

|        |                                                       |
|--------|-------------------------------------------------------|
| Page 3 | Mulliken charges on $\text{NO}_3^-$ atoms (Table S1)  |
| Page 3 | Mulliken charges on $\text{ClO}_4^-$ atoms (Table S2) |
| Page 3 | Mulliken charges on $\text{PF}_6^-$ atoms (Table S3)  |
| Page 4 | Mulliken charges on TFSI atoms (Table S4)             |
| Page 5 | Mulliken charges on TPB atoms (Table S5)              |
| Page 6 | Mulliken charges on BARF atoms (Table S6)             |

## 2. NMR Characterization Data

|         |                                                                     |
|---------|---------------------------------------------------------------------|
| Page 7  | $^1\text{H}$ NMR in DMSO of <b>C5-Cl</b> (Figure S1)                |
| Page 8  | $^1\text{H}$ NMR in DMSO of <b>C5-NO<sub>3</sub></b> (Figure S2)    |
| Page 9  | $^1\text{H}$ NMR in DMSO of <b>C5-PF<sub>6</sub></b> (Figure S3)    |
| Page 10 | $^{19}\text{F}$ NMR in DMSO of <b>C5-PF<sub>6</sub></b> (Figure S4) |
| Page 11 | $^1\text{H}$ NMR in DMSO of <b>C5-TFSI</b> (Figure S5)              |
| Page 12 | $^{19}\text{F}$ NMR in DMSO of <b>C5-TFSI</b> (Figure S6)           |
| Page 13 | $^1\text{H}$ NMR in DMSO of <b>C5-TPB</b> (Figure S7)               |
| Page 14 | $^1\text{H}$ NMR in DMSO of <b>C5-BARF</b> (Figure S8)              |
| Page 15 | $^{19}\text{F}$ NMR in DMSO of <b>C5-BARF</b> (Figure S9)           |

## 3. Photophysical Data

|         |                                                                                                 |
|---------|-------------------------------------------------------------------------------------------------|
| Page 16 | Full spectrum molar absorptivity and emission plot in MeCN (Figure S10).                        |
| Page 16 | Full spectrum molar absorptivity and emission plot in MeCN (Figure S11).                        |
| Page 17 | Concentration versus absorbance plot for <b>C5-Cl</b> in DCM (Figure S12).                      |
| Page 17 | Concentration versus absorbance plot for <b>C5-NO<sub>3</sub></b> in DCM (Figure S13).          |
| Page 18 | Concentration versus absorbance plot for <b>C5-PF<sub>6</sub></b> in DCM (Figure S14).          |
| Page 18 | Concentration versus absorbance plot for <b>C5-TFSI</b> in DCM (Figure S15).                    |
| Page 19 | Concentration versus absorbance plot for <b>C5-TPB</b> in DCM (Figure S16).                     |
| Page 19 | Concentration versus absorbance plot for <b>C5-BARF</b> in DCM (Figure S17).                    |
| Page 20 | Concentration versus absorbance plot for <b>C5-Cl</b> in MeCN (Figure S18).                     |
| Page 20 | Concentration versus absorbance plot for <b>C5-NO<sub>3</sub></b> in MeCN (Figure S19).         |
| Page 21 | Concentration versus absorbance plot for <b>C5-PF<sub>6</sub></b> in MeCN (Figure S20).         |
| Page 21 | Concentration versus absorbance plot for <b>C5-TFSI</b> in MeCN (Figure S21).                   |
| Page 22 | Concentration versus absorbance plot for <b>C5-TPB</b> in MeCN (Figure S22).                    |
| Page 22 | Concentration versus absorbance plot for <b>C5-BARF</b> in MeCN (Figure S23).                   |
| Page 23 | Absorption spectrum of varying concentrations of <b>C5-Cl</b> in MeCN (Figure S24).             |
| Page 23 | Film absorption spectrum not normalized (Figure S25).                                           |
| Page 23 | Film absorption with <b>C5-Cl</b> on glass with varying concentrations of the dye (Figure S26). |
| Page 24 | Film absorption with <b>C5-TPB</b> on glass varying dye concentrations (Figure S27).            |
| Page 24 | Film absorption with <b>C5-TPB</b> and <b>C5-Cl</b> on FTO coated glass (Figure S28).           |

**Table S1.** Mulliken charges on NO<sub>3</sub><sup>-</sup> atoms.

| Atom Number | Atom | Charge    |
|-------------|------|-----------|
| 1           | N    | -0.052098 |
| 2           | O    | -0.315967 |
| 3           | O    | -0.315967 |
| 4           | O    | -0.315967 |

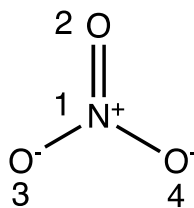**Table S2.** Mulliken charges on ClO<sub>4</sub><sup>-</sup> atoms.

| Atom Number | Atom | Charge    |
|-------------|------|-----------|
| 1           | Cl   | 1.351688  |
| 2           | O    | -0.587922 |
| 3           | O    | -0.587922 |
| 4           | O    | -0.587922 |
| 5           | O    | -0.587922 |

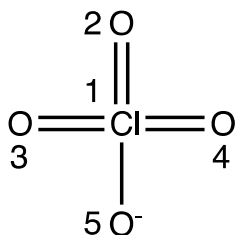**Table S3.** Mulliken charges on PF<sub>6</sub><sup>-</sup> atoms.

| Atom Number | Atom | Charge    |
|-------------|------|-----------|
| 1           | P    | 3.403124  |
| 2           | F    | -0.733854 |
| 3           | F    | -0.733854 |
| 4           | F    | -0.733854 |
| 5           | F    | -0.733854 |
| 6           | F    | -0.733854 |
| 7           | F    | -0.733854 |

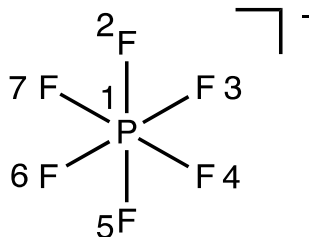

**Table S4.** Mulliken charges on TFSI atoms.

| Atom Number | Atom | Charge    |
|-------------|------|-----------|
| 1           | S    | 1.176786  |
| 2           | C    | 0.742771  |
| 3           | F    | -0.309487 |
| 4           | F    | -0.294206 |
| 5           | F    | -0.266768 |
| 6           | N    | -0.878432 |
| 7           | S    | 1.117281  |
| 8           | C    | 0.828531  |
| 9           | F    | -0.315792 |
| 10          | F    | -0.282991 |
| 11          | F    | -0.274752 |
| 12          | O    | -0.556669 |
| 13          | O    | -0.568497 |
| 14          | O    | -0.551996 |
| 15          | O    | -0.565780 |

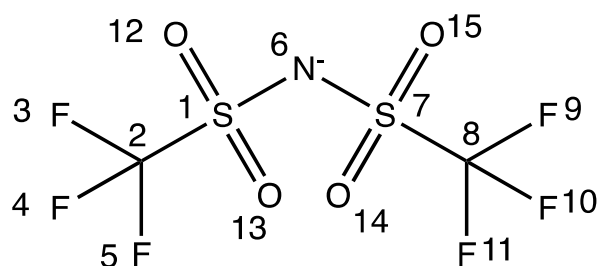

**Table S5.** Mulliken charges on TPB atoms.

| Atom Number | Atom | Charge    |
|-------------|------|-----------|
| 1           | B    | -0.158270 |
| 2           | C    | 1.128749  |
| 3           | C    | -0.481455 |
| 4           | C    | -0.418219 |
| 5           | C    | -0.330027 |
| 6           | C    | -0.418219 |
| 7           | C    | -0.481455 |
| 8           | H    | 0.178060  |
| 9           | H    | 0.145291  |
| 10          | H    | 0.143492  |
| 11          | H    | 0.145291  |
| 12          | H    | 0.178060  |
| 13          | C    | 1.128749  |
| 14          | C    | -0.481455 |
| 15          | C    | -0.418219 |
| 16          | C    | -0.330027 |
| 17          | C    | -0.418219 |
| 18          | C    | -0.481455 |
| 19          | H    | 0.178060  |
| 20          | H    | 0.145291  |
| 21          | H    | 0.143492  |
| 22          | H    | 0.145291  |
| 23          | H    | 0.178060  |
| 24          | C    | 1.128749  |
| 25          | C    | -0.481455 |
| 26          | C    | -0.418219 |
| 27          | C    | -0.330027 |
| 28          | C    | -0.418219 |
| 29          | C    | -0.481455 |
| 30          | H    | 0.178060  |
| 31          | H    | 0.145291  |
| 32          | H    | 0.143492  |
| 33          | H    | 0.145291  |
| 34          | H    | 0.178060  |
| 35          | C    | 1.128749  |
| 36          | C    | -0.481455 |
| 37          | C    | -0.418219 |
| 38          | C    | -0.330027 |
| 39          | C    | -0.418219 |
| 40          | C    | -0.481455 |
| 41          | H    | 0.178060  |
| 42          | H    | 0.145291  |
| 43          | H    | 0.143492  |
| 44          | H    | 0.145291  |
| 45          | H    | 0.178060  |

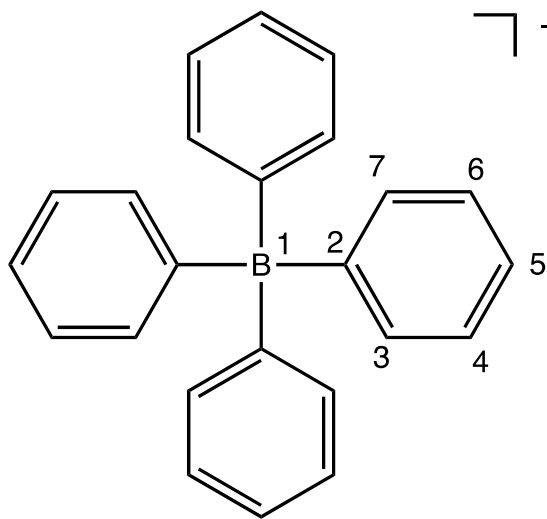

**Table S6.** Mulliken charges on BARF atoms.

| Atom<br>Number | Atom | Charge    |
|----------------|------|-----------|
| 1              | B    | 0.246940  |
| 2              | C    | -0.467115 |
| 3              | C    | 0.030678  |
| 4              | C    | -1.081474 |
| 5              | C    | -0.353031 |
| 6              | C    | -0.525904 |
| 7              | C    | -0.424496 |
| 8              | H    | 0.215602  |
| 9              | C    | 1.885359  |
| 10             | F    | -0.322164 |
| 11             | F    | -0.302350 |
| 12             | F    | -0.273043 |
| 13             | H    | 0.220926  |
| 14             | C    | 1.771129  |
| 15             | F    | -0.296042 |
| 16             | F    | -0.274135 |
| 17             | F    | -0.332978 |
| 18             | H    | 0.220021  |
| 19             | C    | -0.337231 |
| 20             | C    | 0.010444  |
| 21             | C    | -1.091433 |
| 22             | C    | -0.315577 |
| 23             | C    | -0.594870 |
| 24             | C    | -0.373494 |
| 25             | H    | 0.215116  |
| 26             | C    | 1.752906  |
| 27             | F    | -0.304481 |
| 28             | F    | -0.268874 |
| 29             | F    | -0.327559 |
| 30             | H    | 0.220899  |
| 31             | C    | 1.838879  |
| 32             | F    | -0.272759 |
| 33             | F    | -0.301823 |
| 34             | F    | -0.329219 |
| 35             | H    | 0.221551  |
| 36             | C    | -0.409728 |
| 37             | C    | -0.022202 |
| 38             | C    | -1.101163 |
| 39             | C    | -0.314471 |
| 40             | C    | -0.573120 |

  

| Atom<br>Number | Atom | Charge    |
|----------------|------|-----------|
| 41             | C    | -0.341871 |
| 42             | H    | 0.215555  |
| 43             | C    | 1.737881  |
| 44             | F    | -0.269514 |
| 45             | F    | -0.304927 |
| 46             | F    | -0.328041 |
| 47             | H    | 0.221053  |
| 48             | C    | 1.828482  |
| 49             | F    | -0.271783 |
| 50             | F    | -0.300031 |
| 51             | F    | -0.329847 |
| 52             | H    | 0.220930  |
| 53             | C    | -0.391629 |
| 54             | C    | -0.316589 |
| 55             | C    | -0.740104 |
| 56             | C    | -0.283551 |
| 57             | C    | -1.233593 |
| 58             | C    | 0.015076  |
| 59             | H    | 0.219623  |
| 60             | C    | 1.870671  |
| 61             | F    | -0.332687 |
| 62             | F    | -0.271987 |
| 63             | F    | -0.297009 |
| 64             | H    | 0.220620  |
| 65             | C    | 1.887648  |
| 66             | F    | -0.265933 |
| 67             | F    | -0.303000 |
| 68             | F    | -0.330092 |
| 69             | H    | 0.214931  |

**Figure S1.**  $^1\text{H}$  NMR of **C5-BARF** in DMSO.

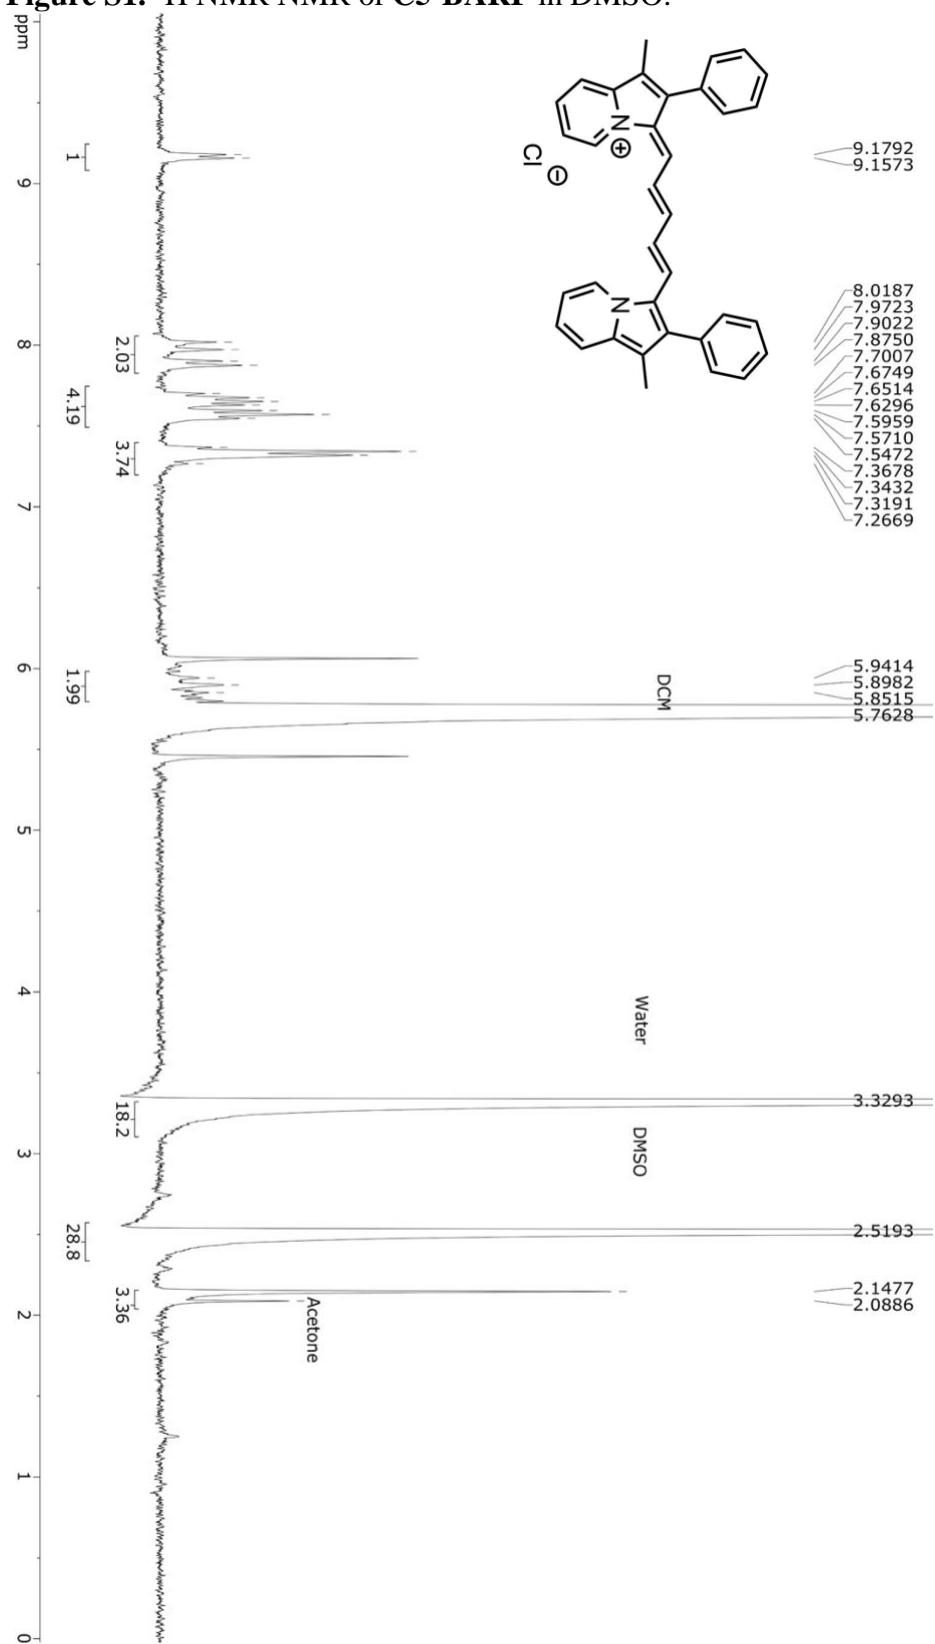

**Figure S2.**  $^1\text{H}$  NMR (DMSO) of C5- $\text{NO}_3$

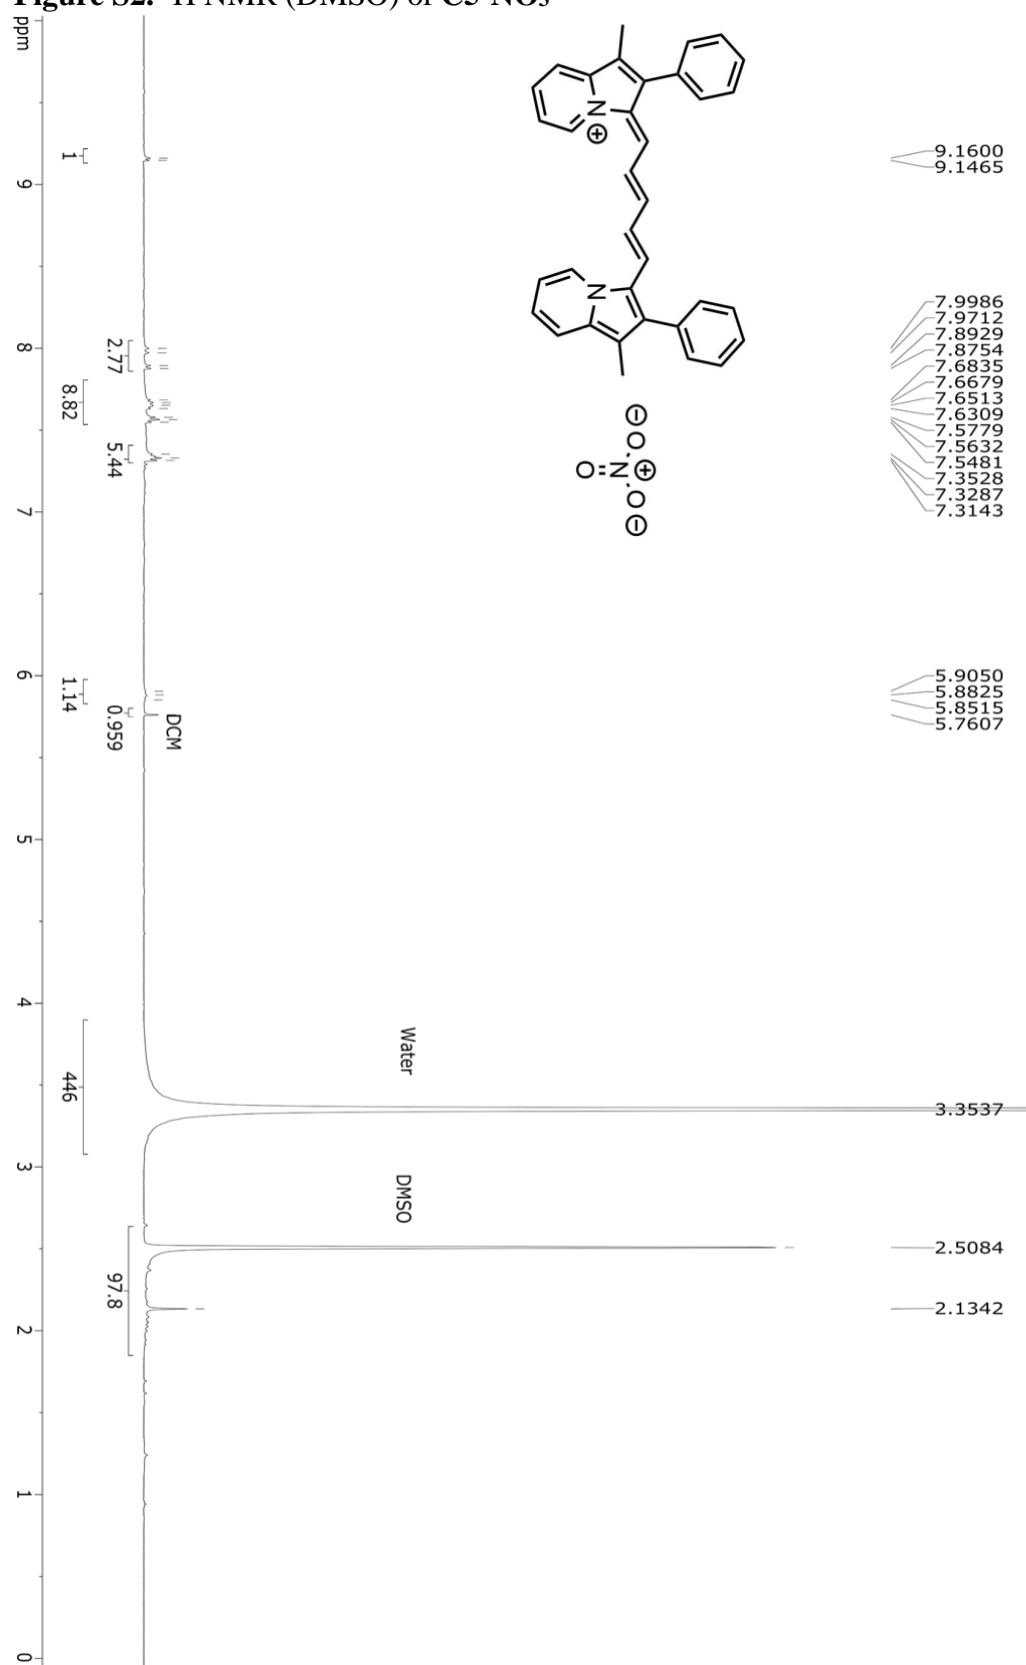

**Figure S3.**  $^1\text{H}$  NMR (DMSO) of C5-PF<sub>6</sub>

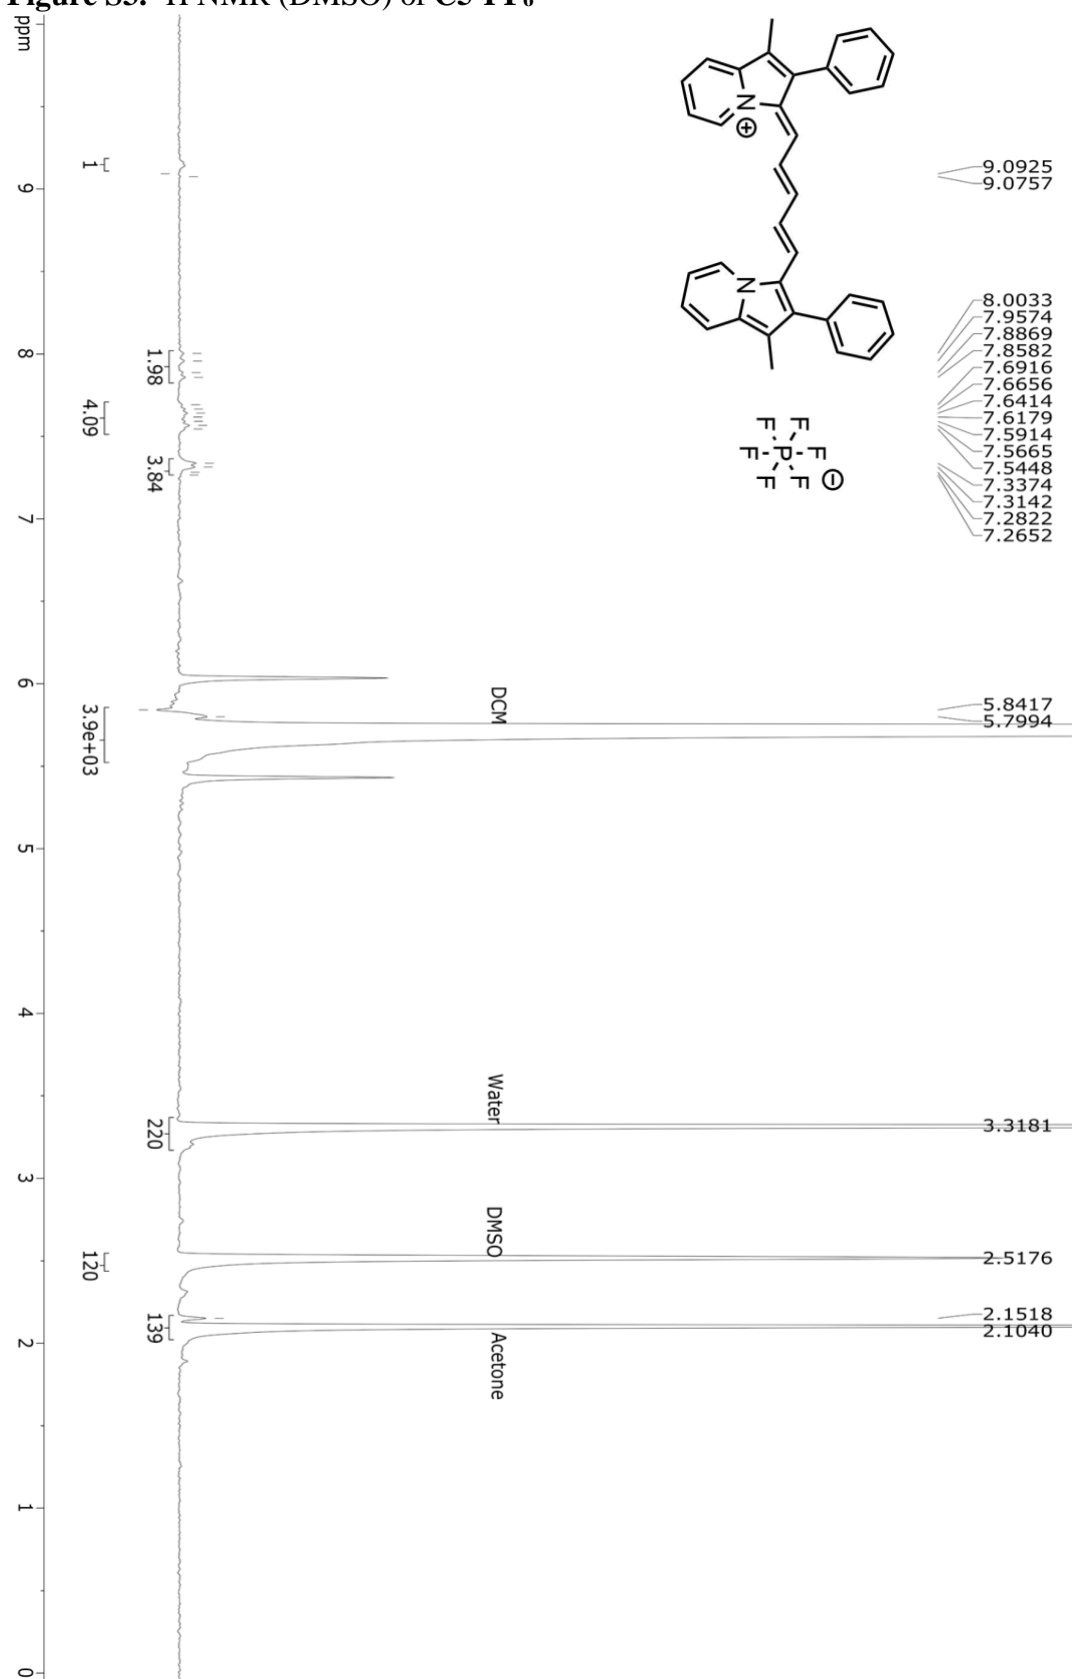

**Figure S4.**  $^{19}\text{F}$  NMR (DMSO) of **C5-PF<sub>6</sub>**

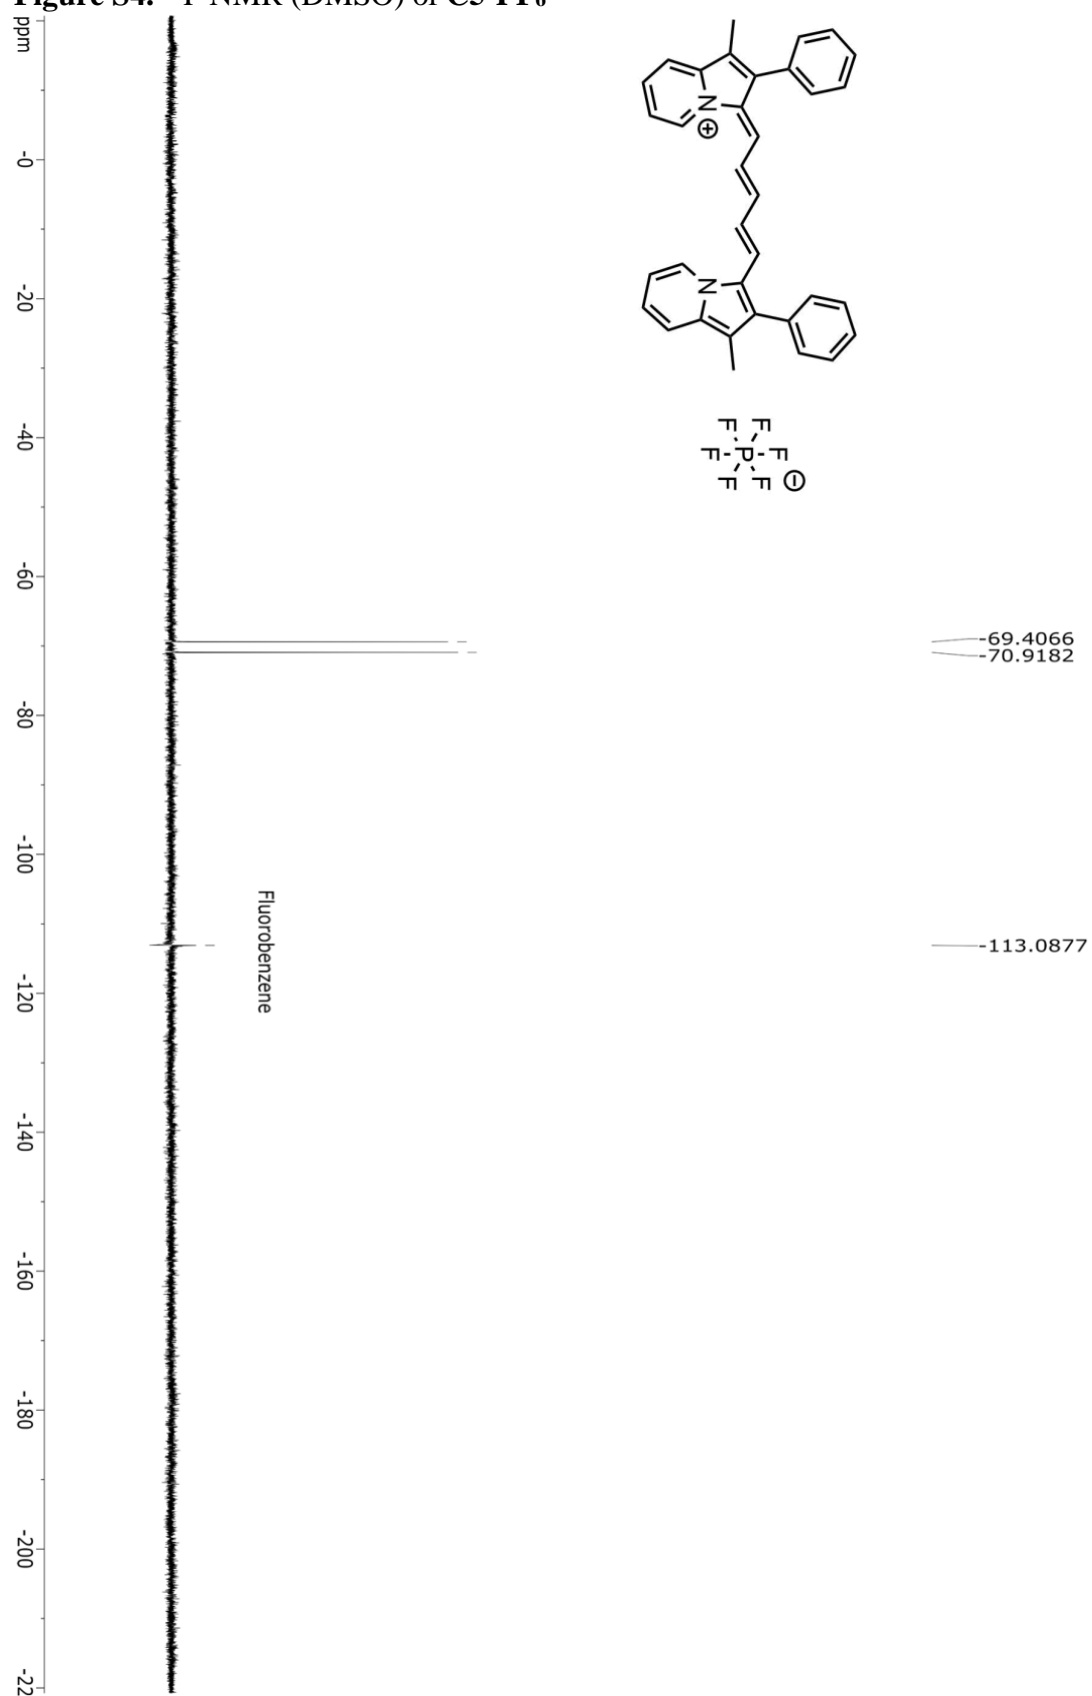

**Figure S5.**  $^1\text{H}$  NMR (DMSO) of C5-TFSI

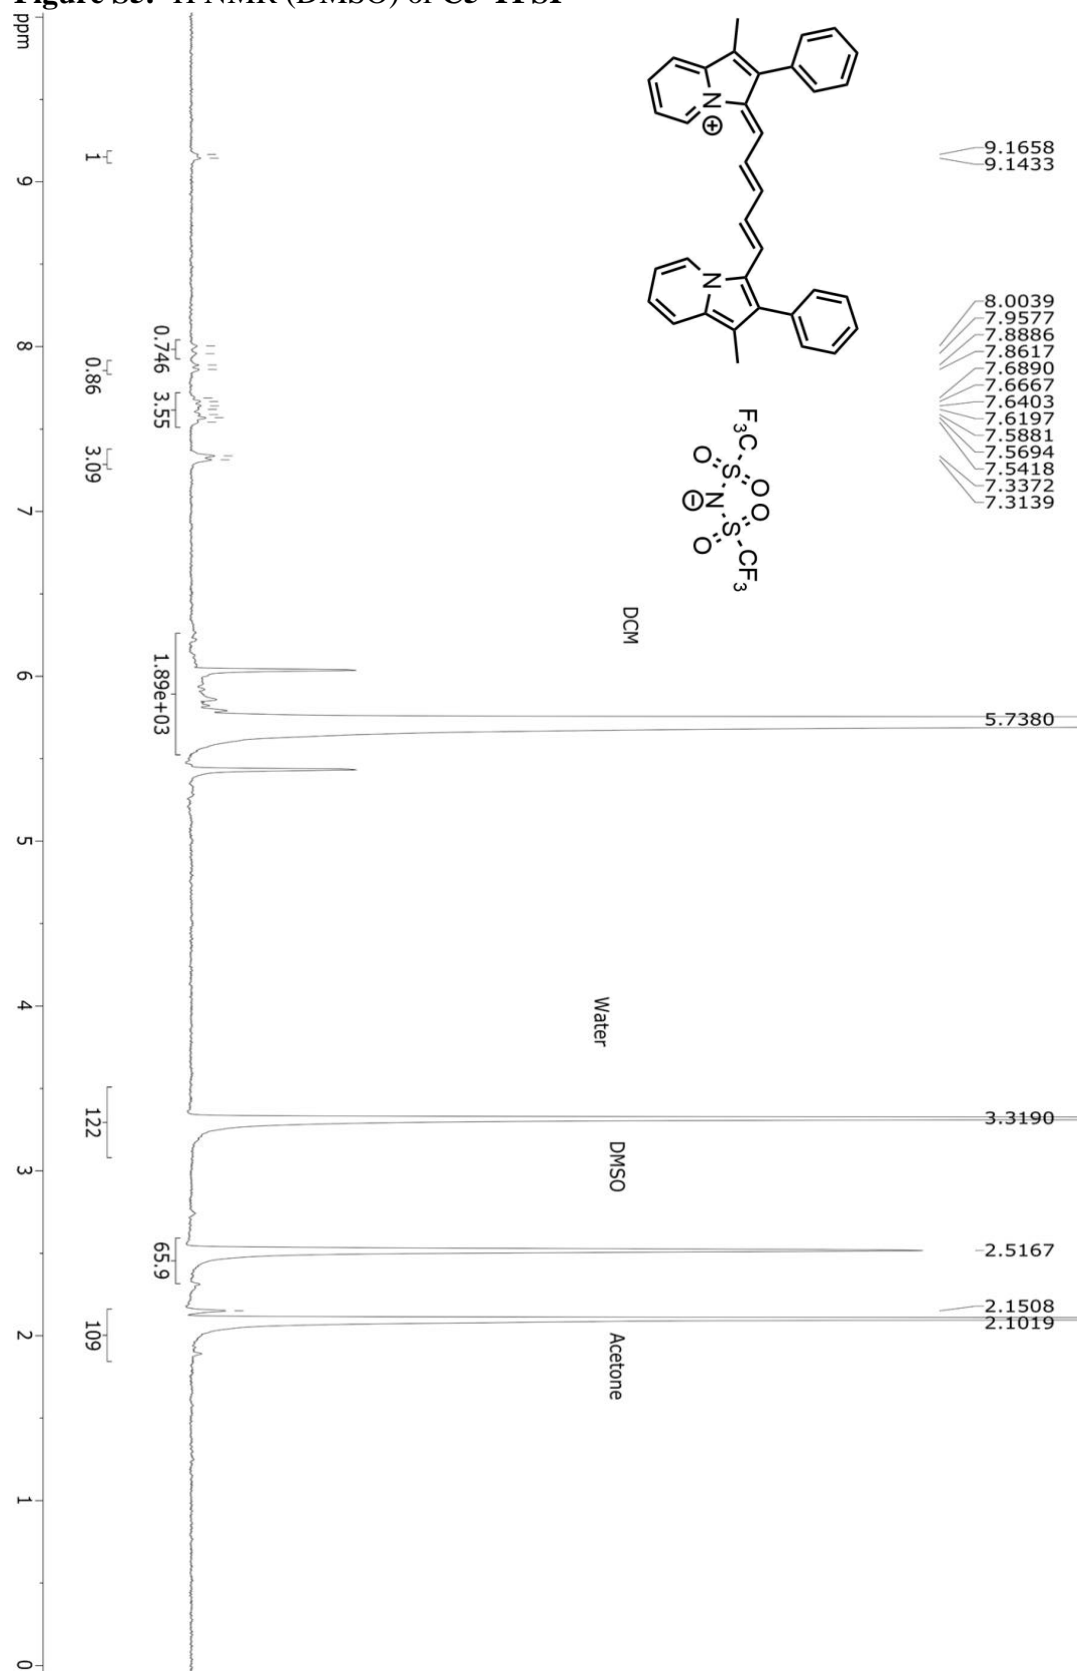

**Figure S6.**  $^{19}\text{F}$  NMR (DMSO) of C5-TFSI

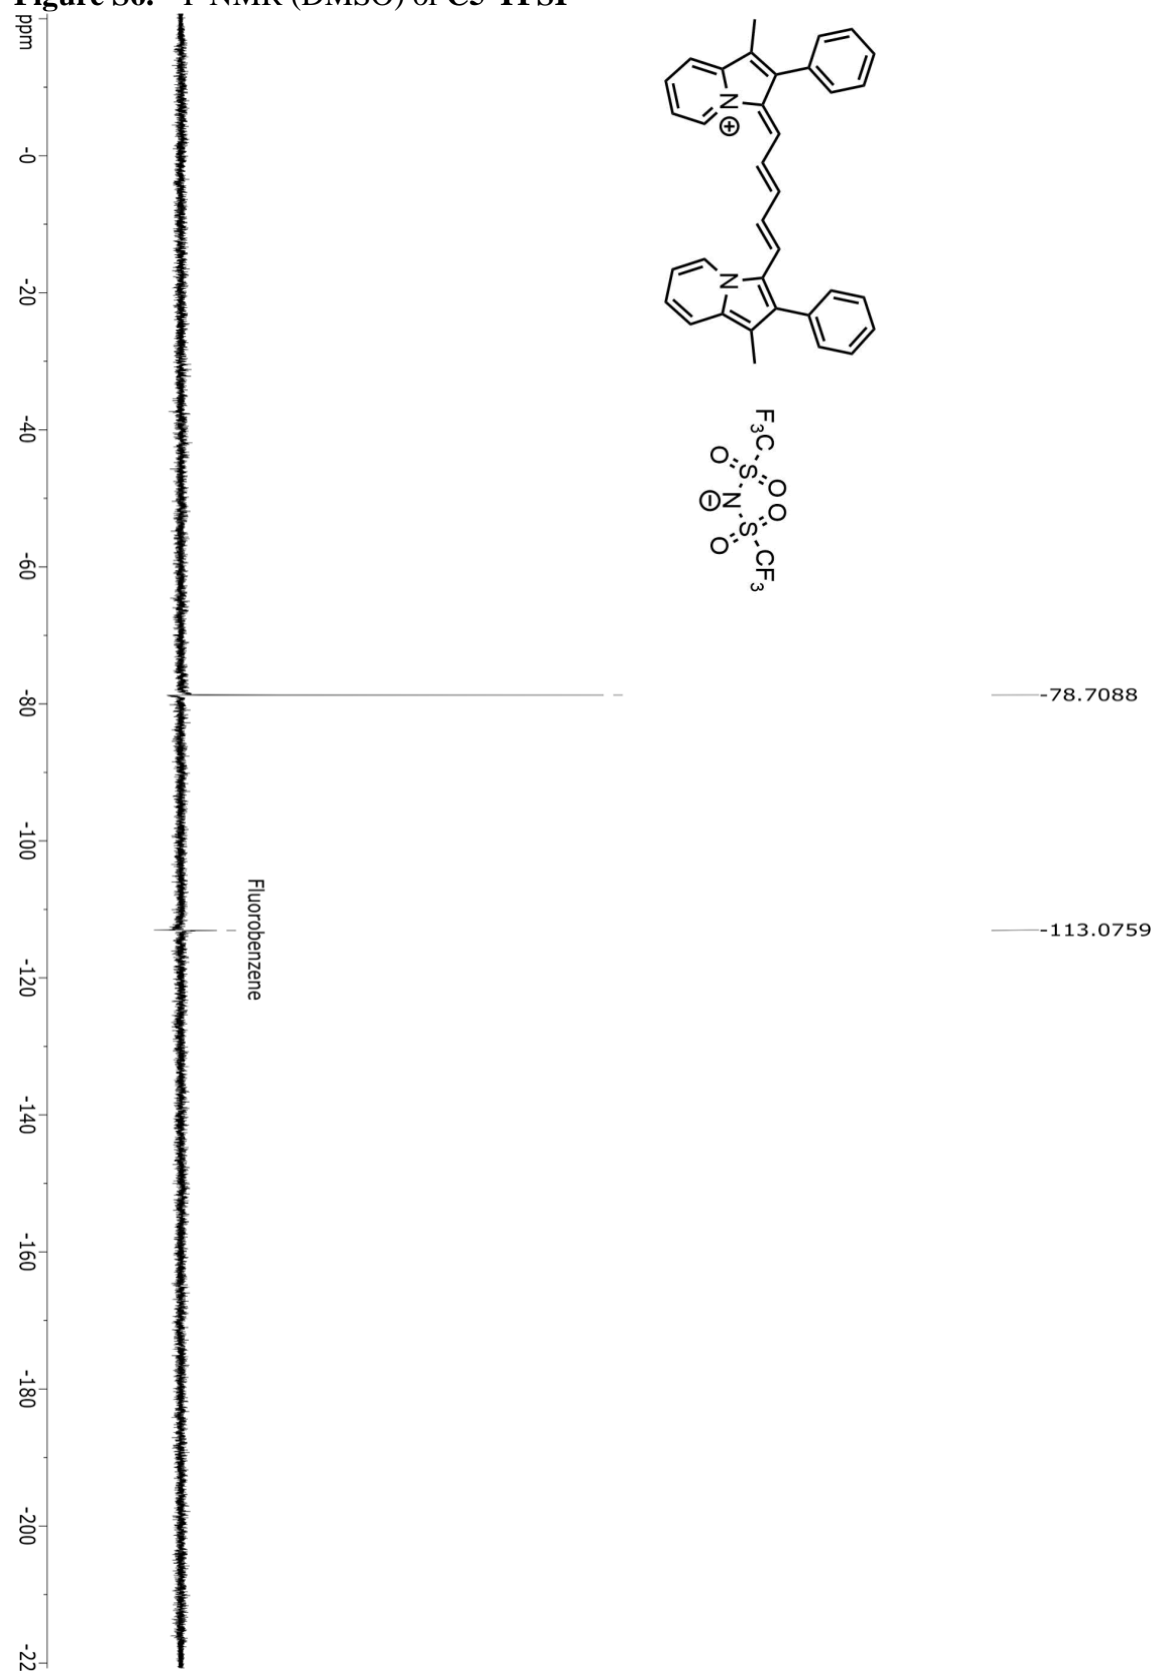

**Figure S7.**  $^1\text{H}$  NMR (DMSO) of C5-TPB

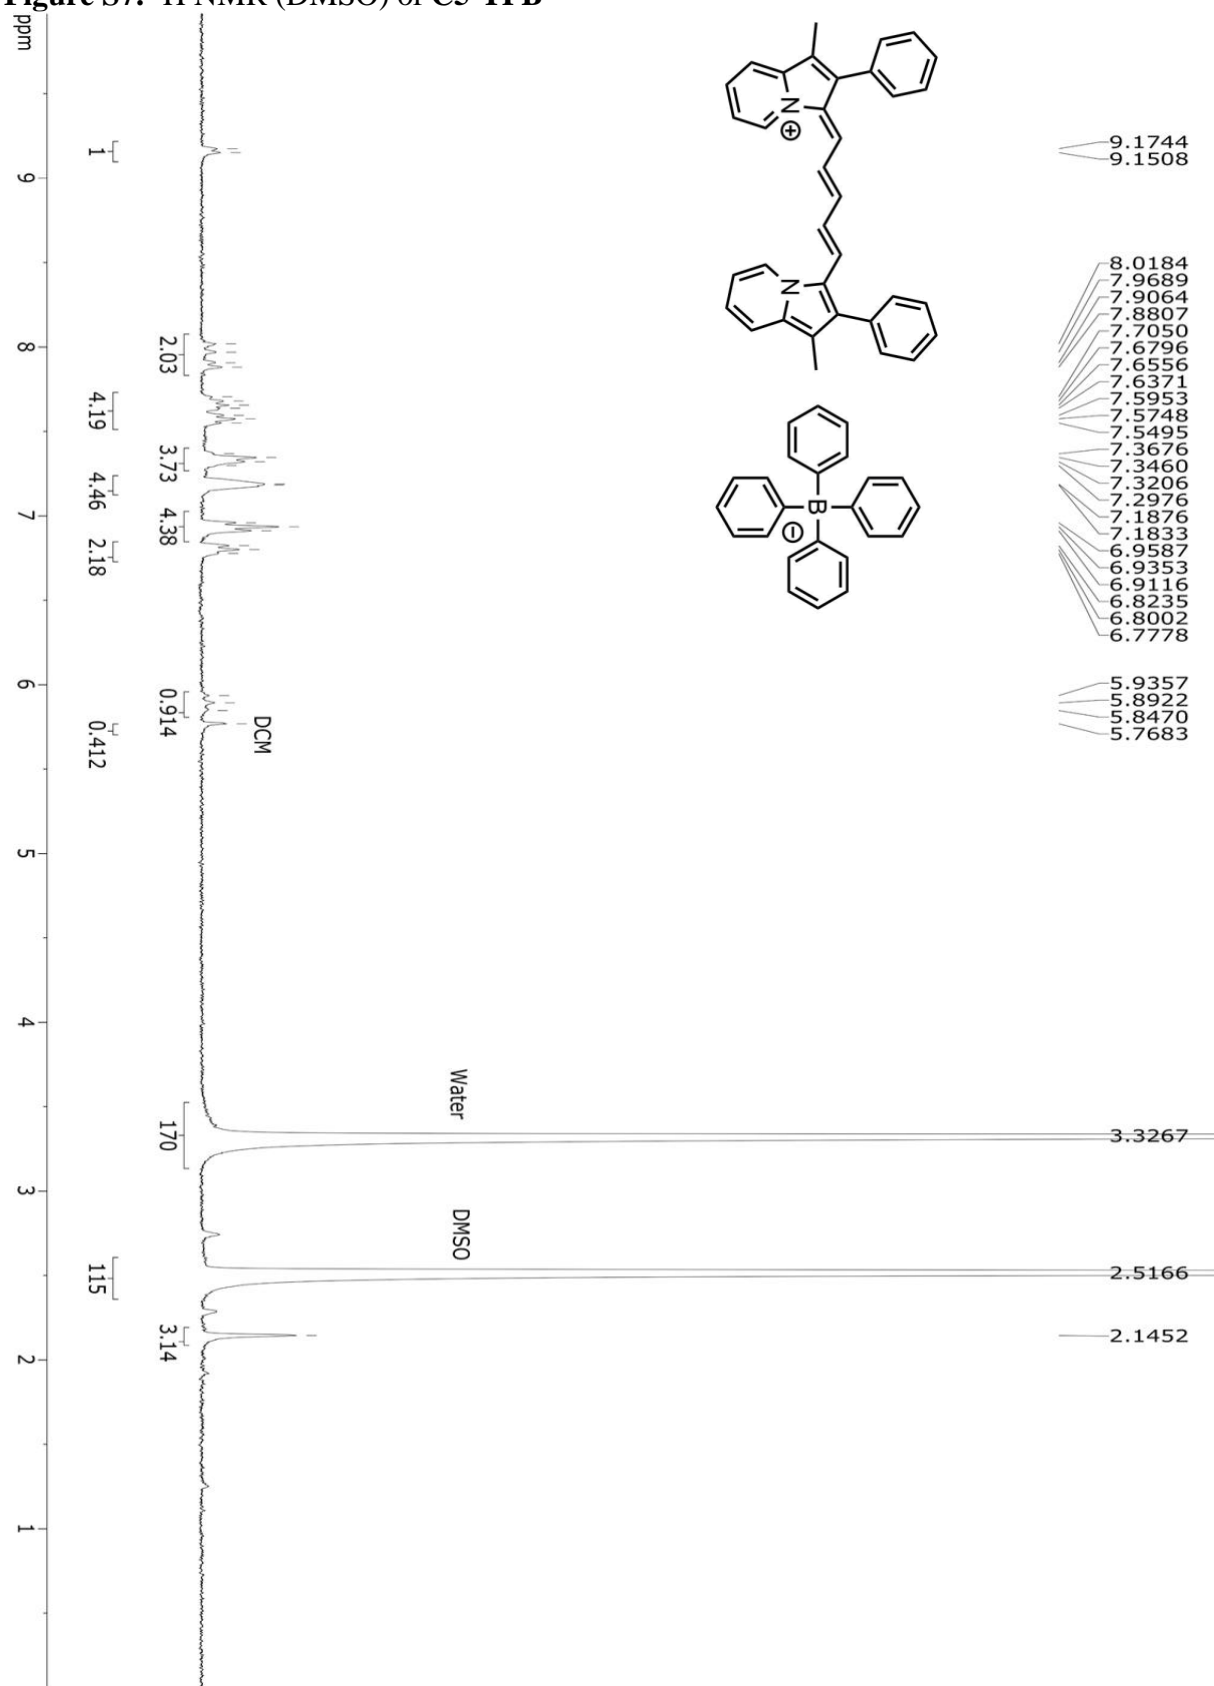

**Figure S8.**  $^1\text{H}$  NMR (DMSO) of C5-BARF

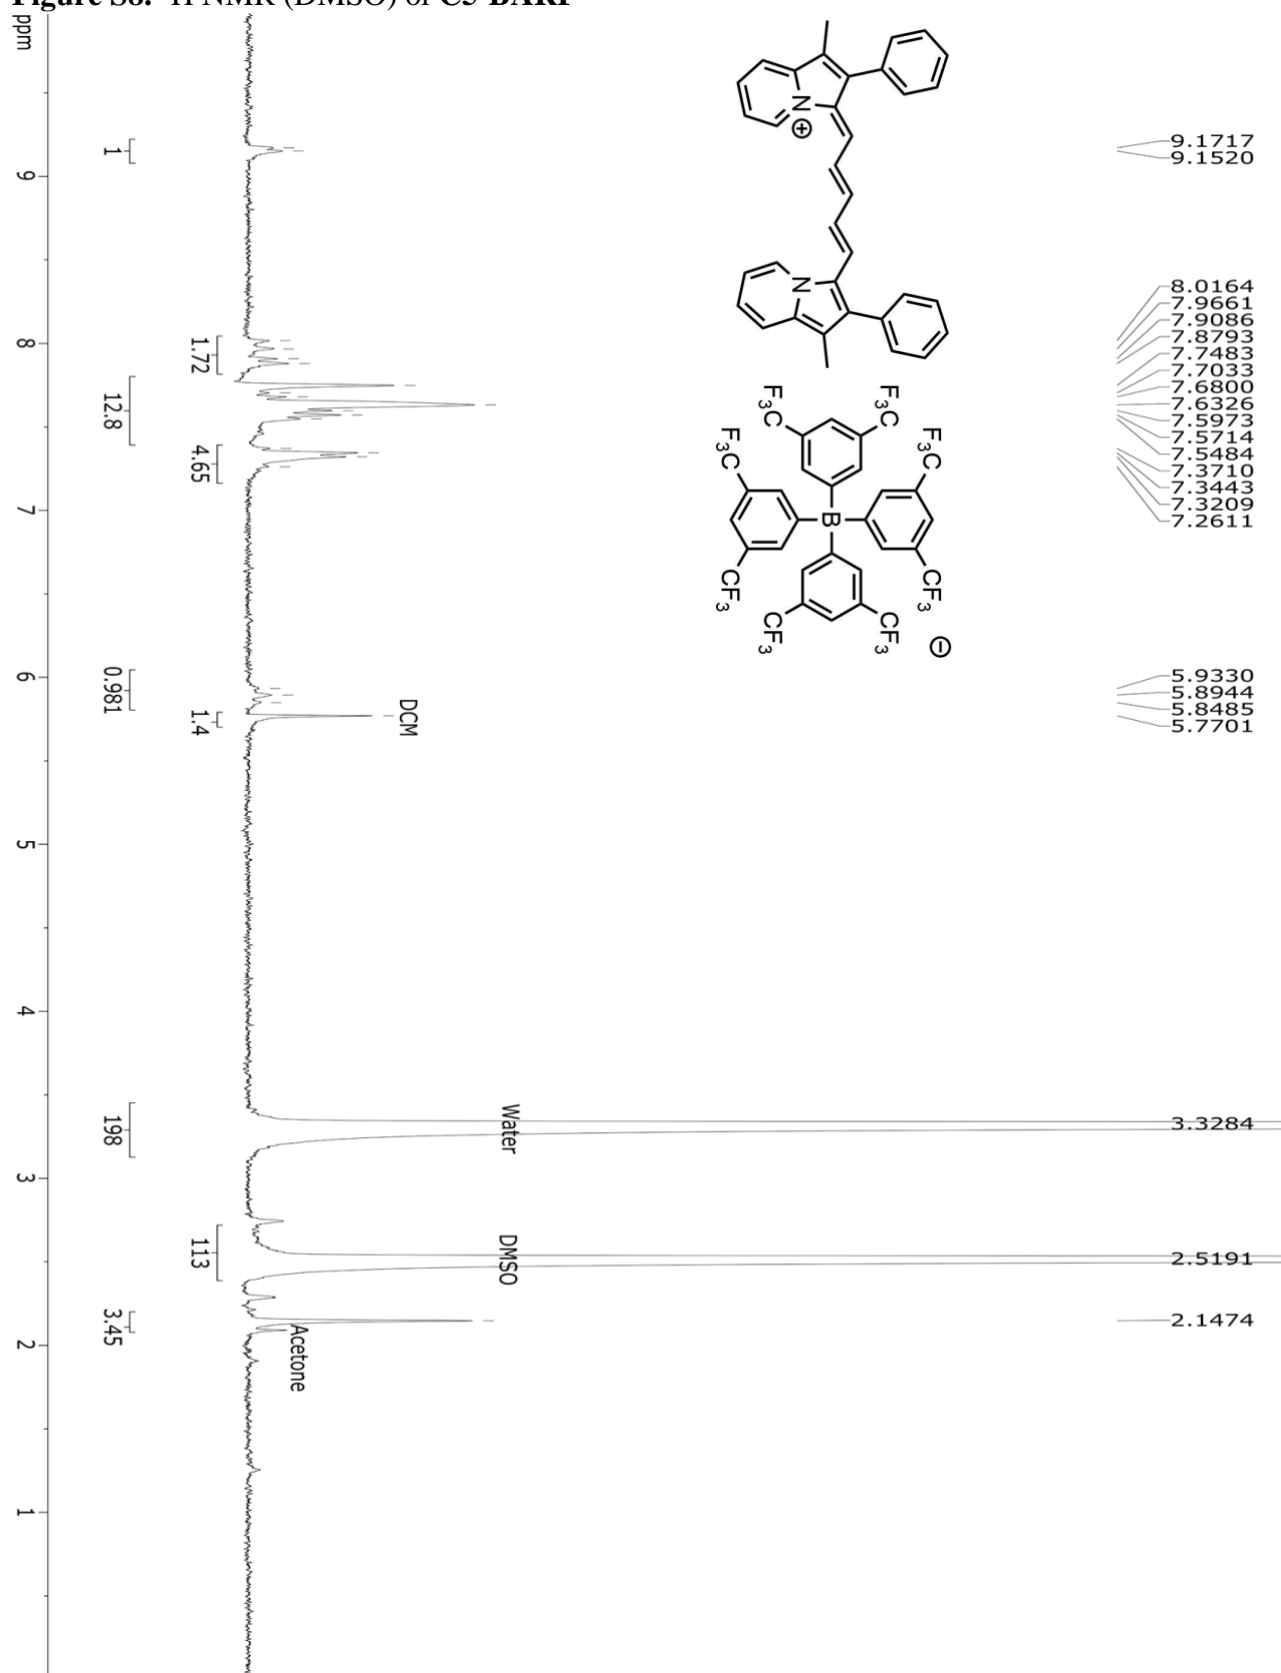

**Figure S9.**  $^{19}\text{F}$  NMR (DMSO) of **C5-BARF**

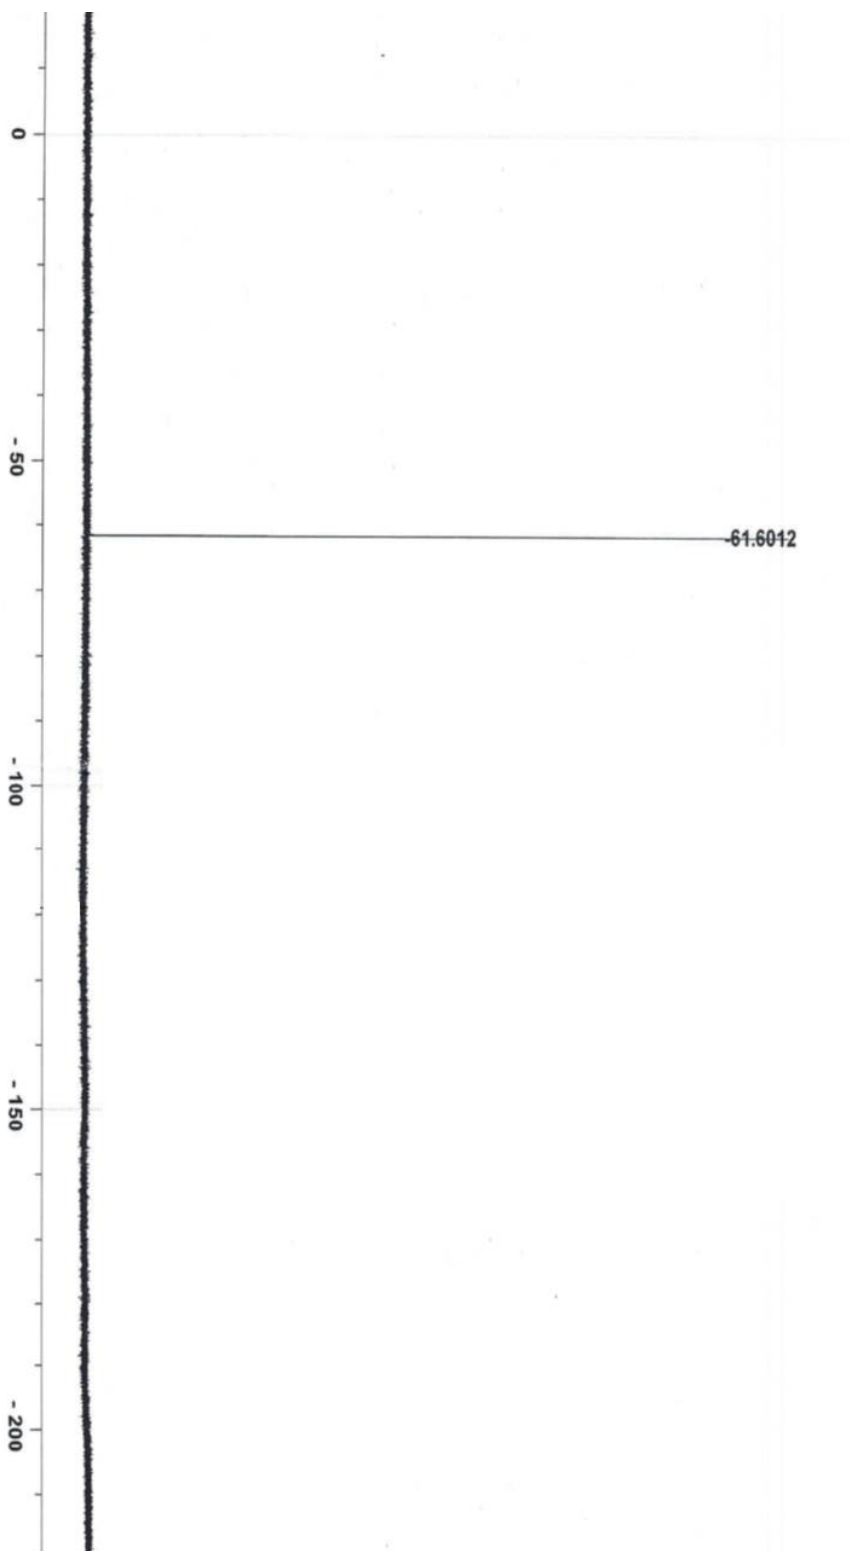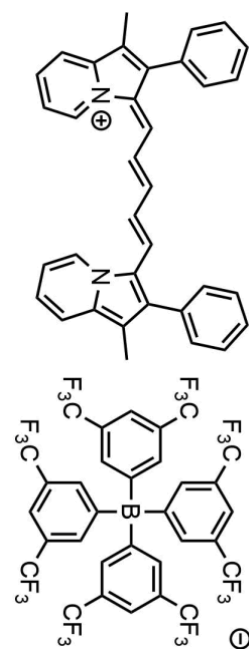

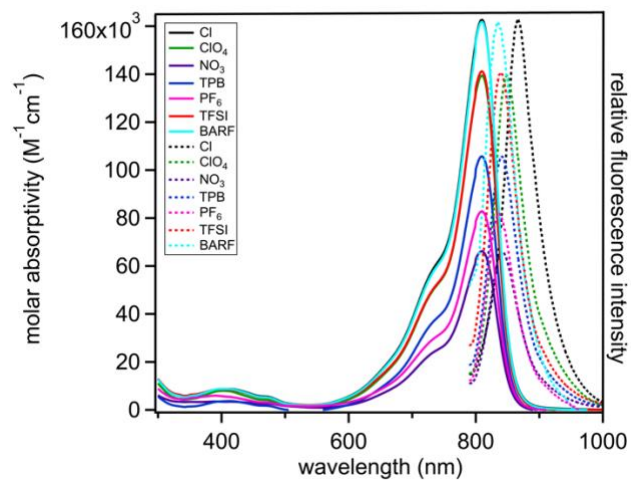

**Figure S10.** Full spectrum (300-1000 nm) of molar absorptivity and emission plot in MeCN.

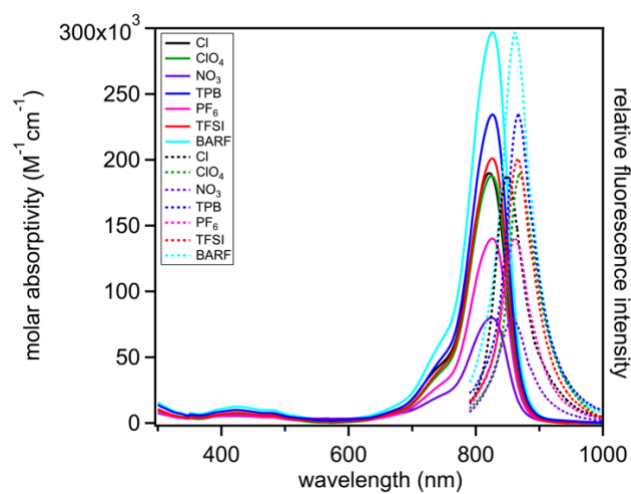

**Figure S11.** Full spectrum (300-1000 nm) of molar absorptivity and emission plot in DCM.

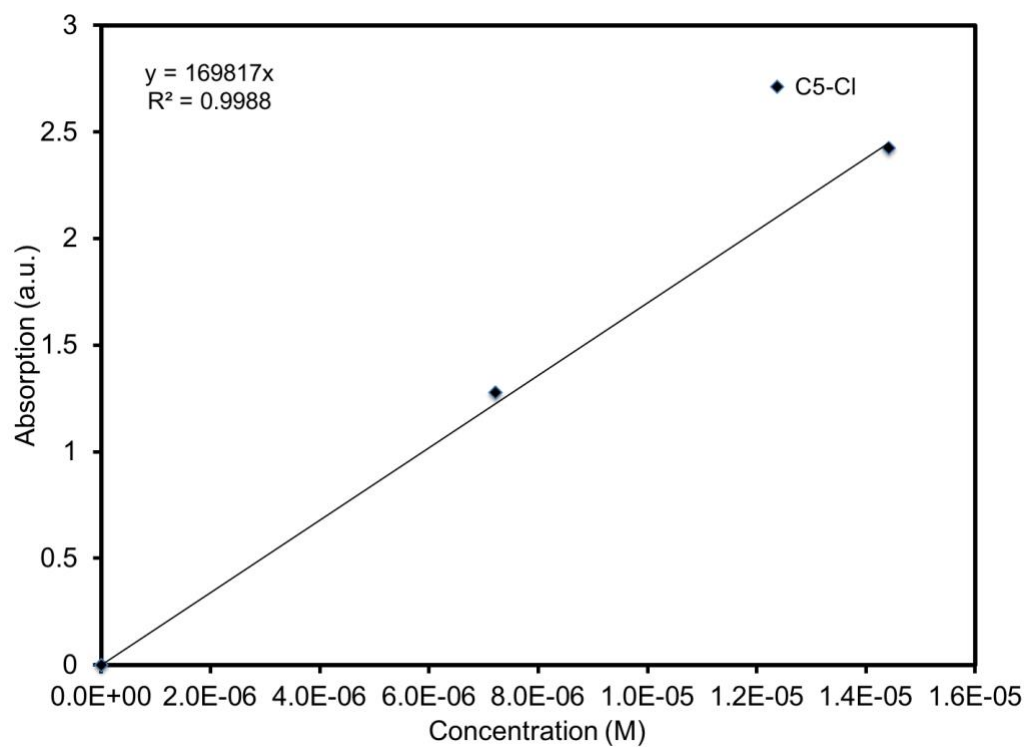

**Figure S12.** Concentration versus absorbance plot for **C5-Cl** in DCM.

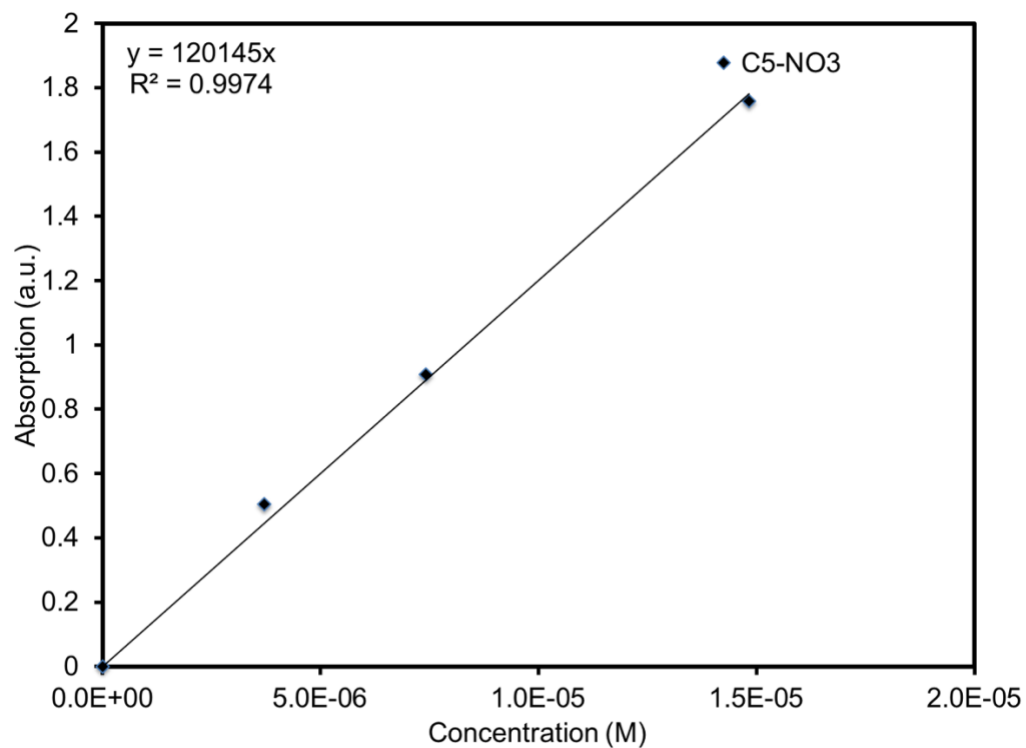

**Figure S13.** Concentration versus absorbance plot for **C5-NO<sub>3</sub>** in DCM.

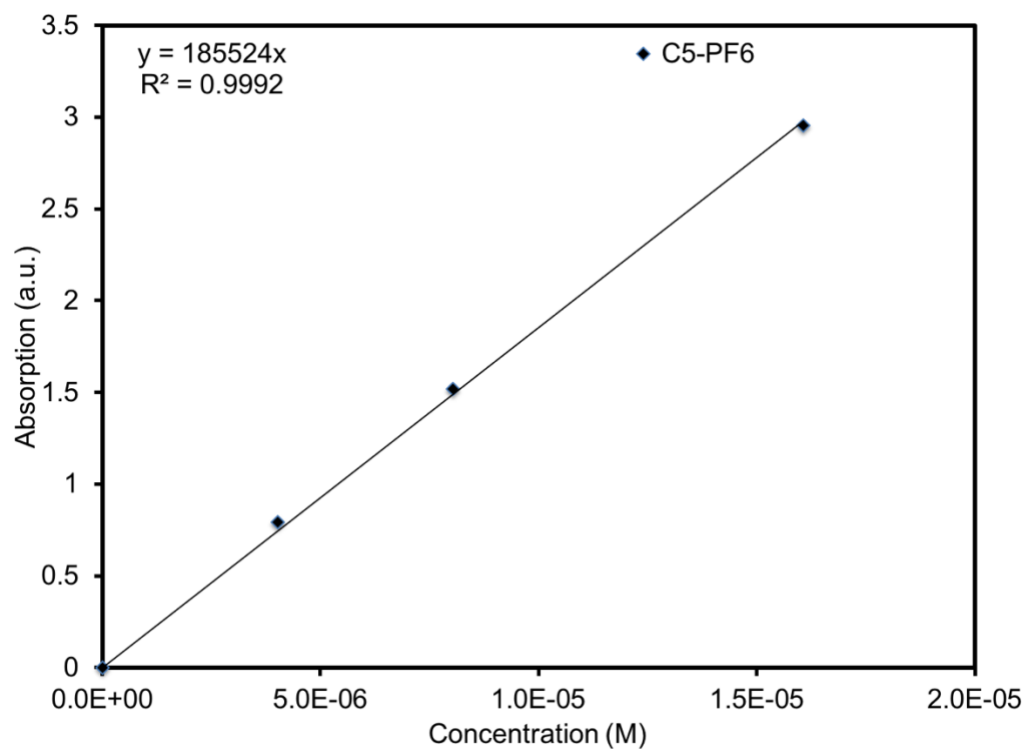

**Figure S14.** Concentration versus absorbance plot for **C5-PF<sub>6</sub>** in DCM.

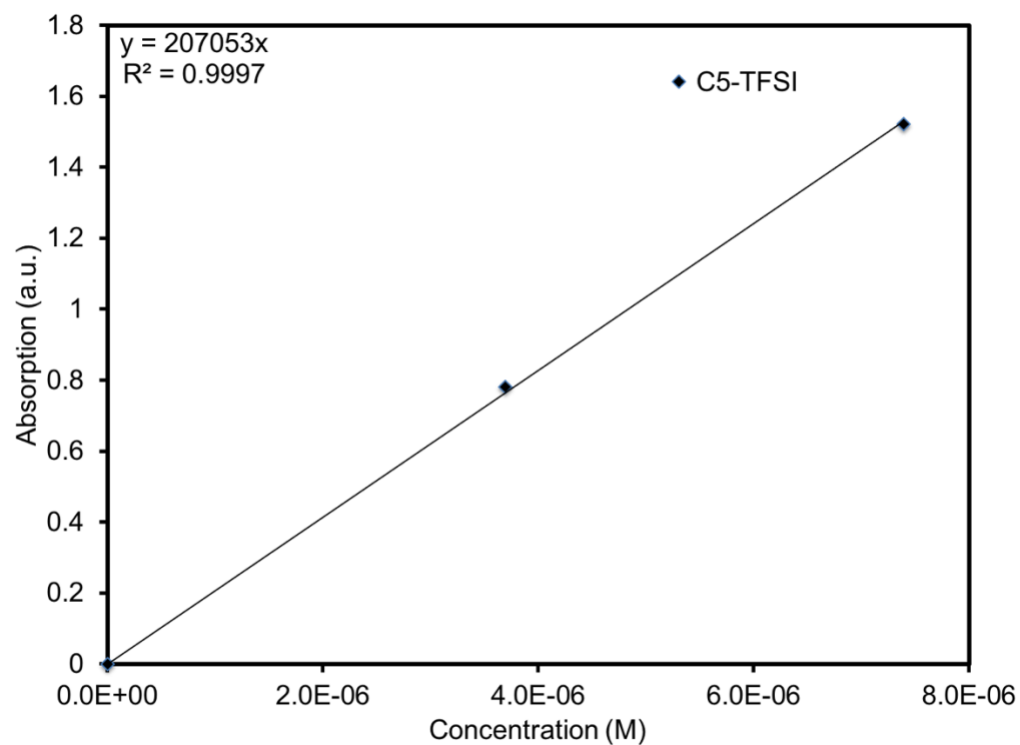

**Figure S15.** Concentration versus absorbance plot for **C5-TFSI** in DCM.

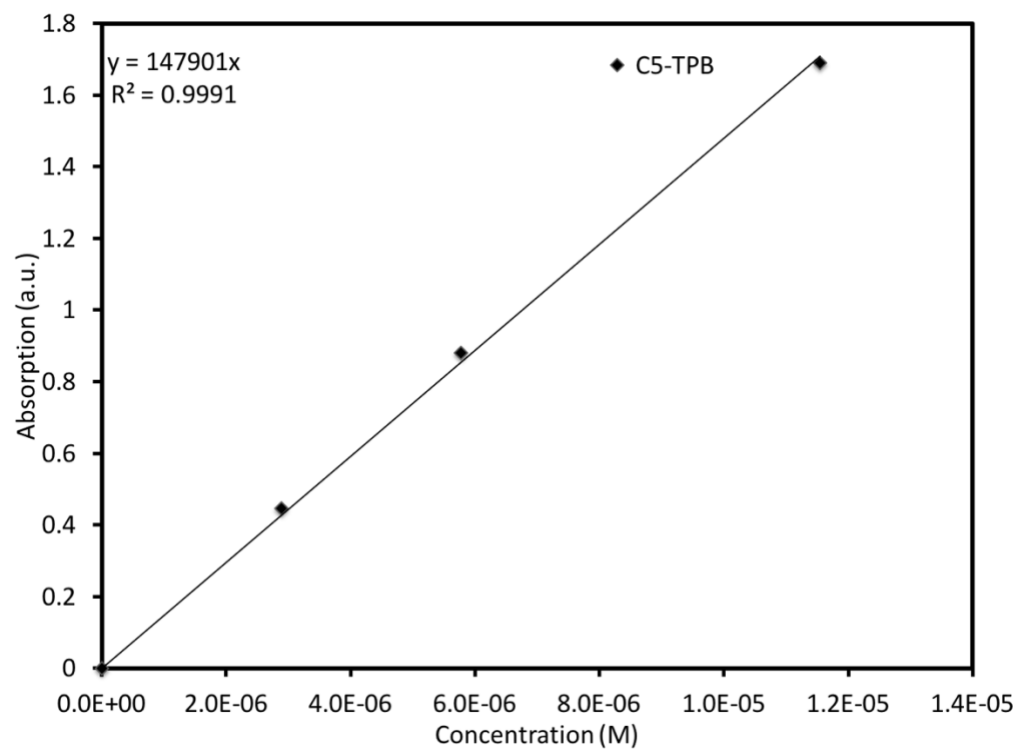

**Figure S16.** Concentration versus absorbance plot for **C5-TPB** in DCM.

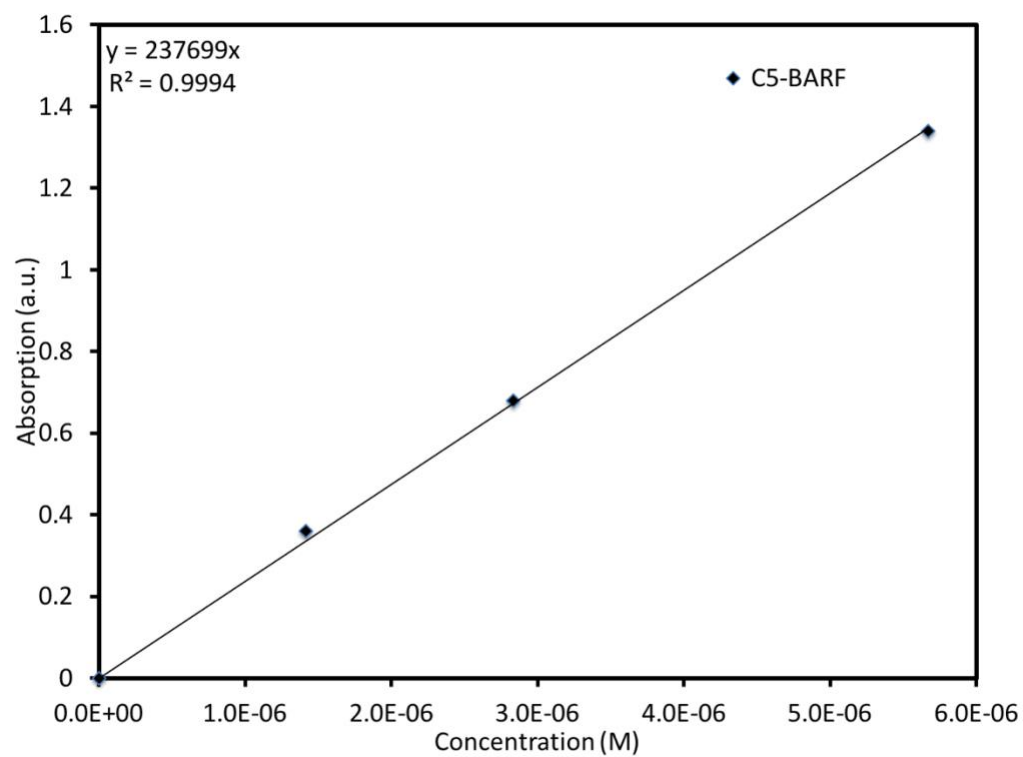

**Figure S17.** Concentration versus absorbance plot for **C5-BARF** in DCM.

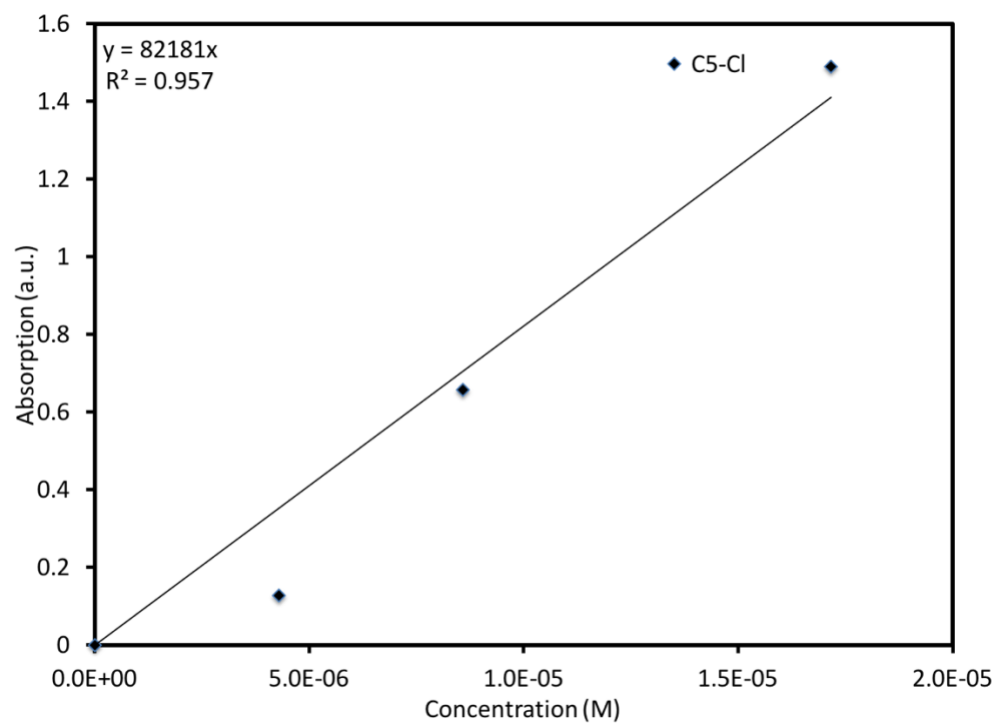

**Figure S18.** Concentration versus absorbance plot for **C5-Cl** in MeCN. A positive deviation from the Beer-Lambert Law is observed.

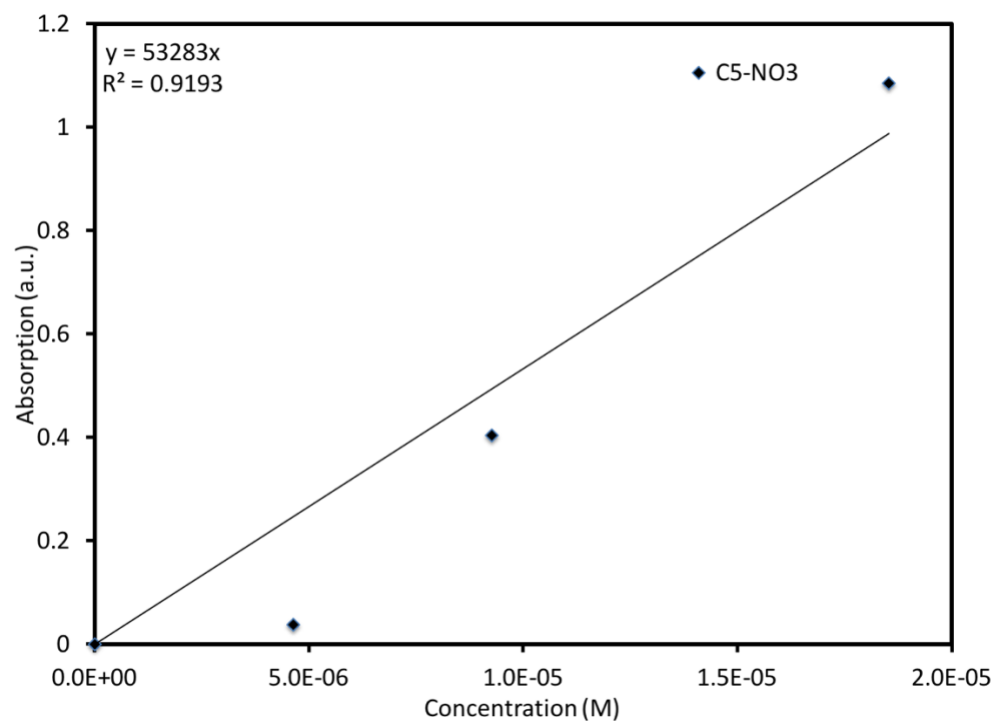

**Figure S19.** Concentration versus absorbance plot for **C5-NO<sub>3</sub>** in MeCN. A positive deviation from the Beer-Lambert Law is observed.

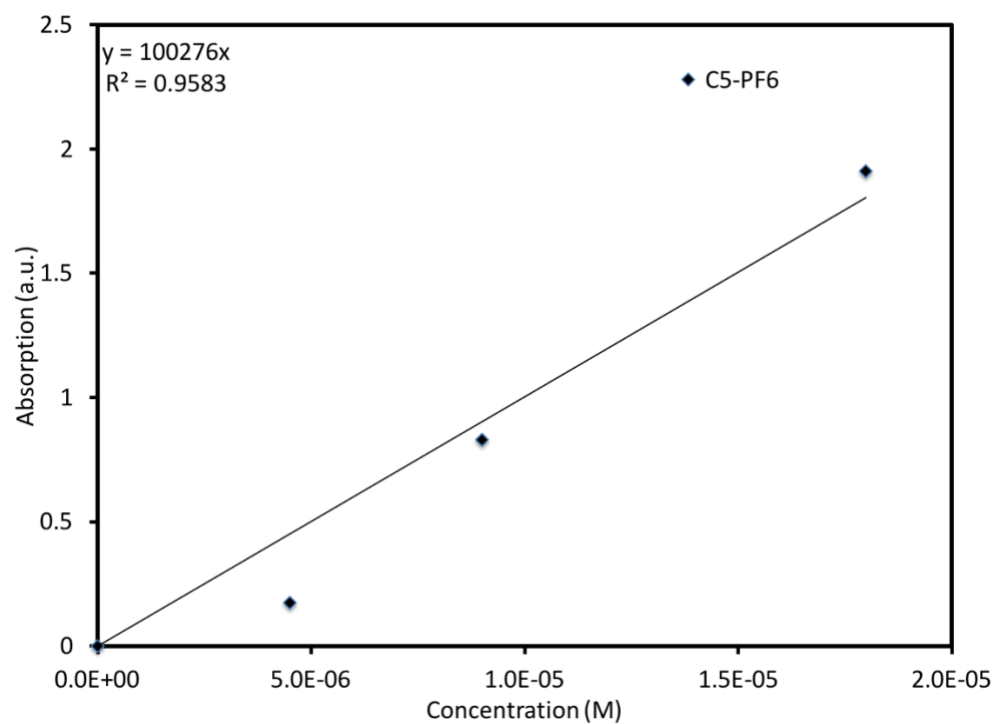

**Figure S20.** Concentration versus absorbance plot for **C5-PF<sub>6</sub>** in MeCN. A positive deviation from the Beer-Lambert Law is observed.

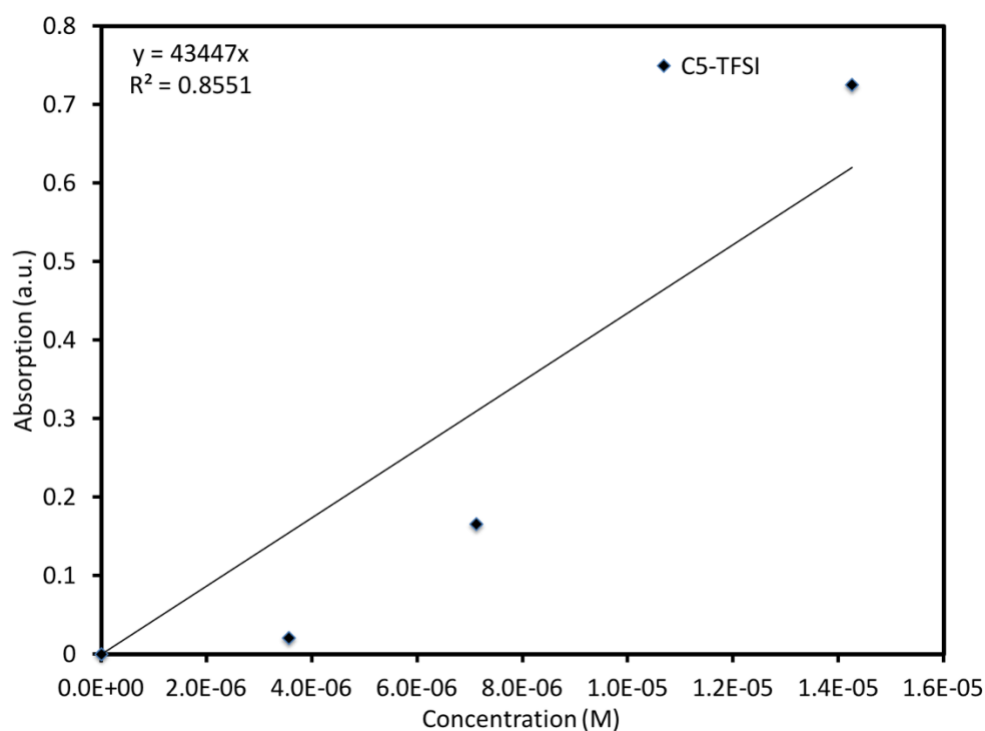

**Figure S21.** Concentration versus absorbance plot for **C5-TFSI** in MeCN. A positive deviation from the Beer-Lambert Law is observed.

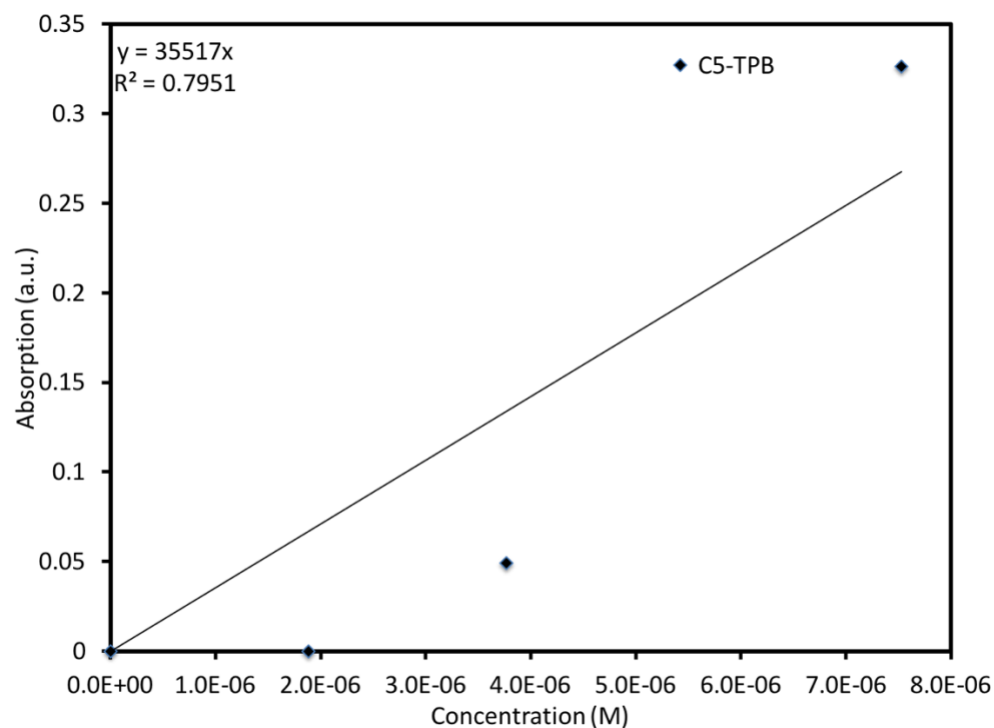

**Figure S22.** Concentration versus absorbance plot for **C5-TPB** in MeCN. A positive deviation from the Beer-Lambert Law is observed.

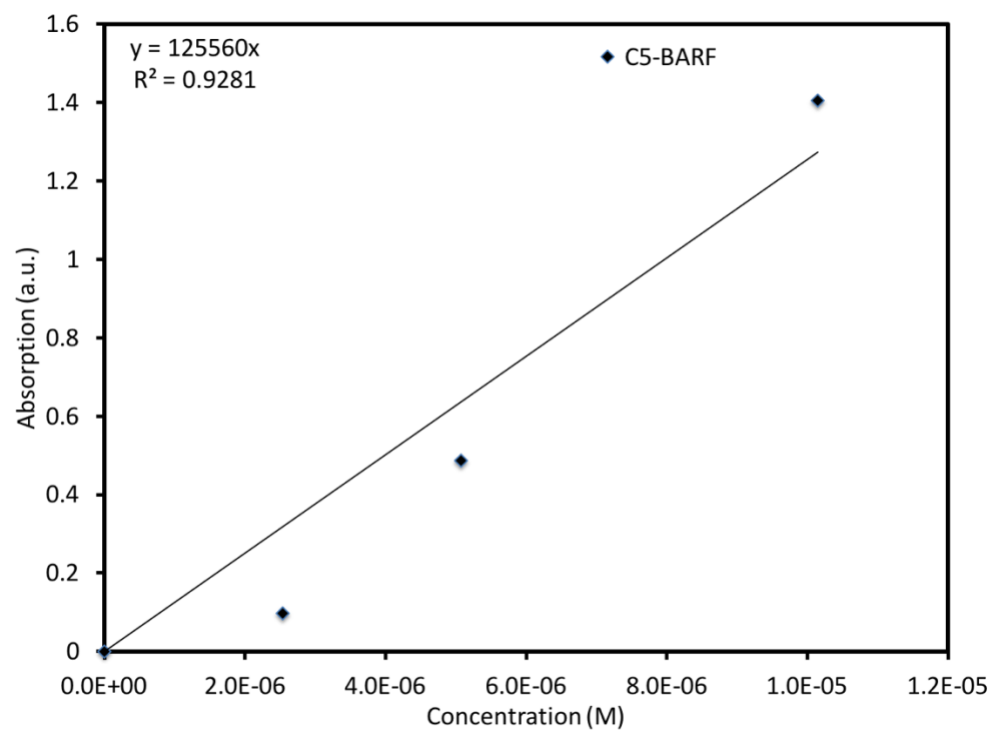

**Figure S23.** Concentration versus absorbance plot for **C5-BARF** in MeCN. A positive deviation from the Beer-Lambert Law is observed.

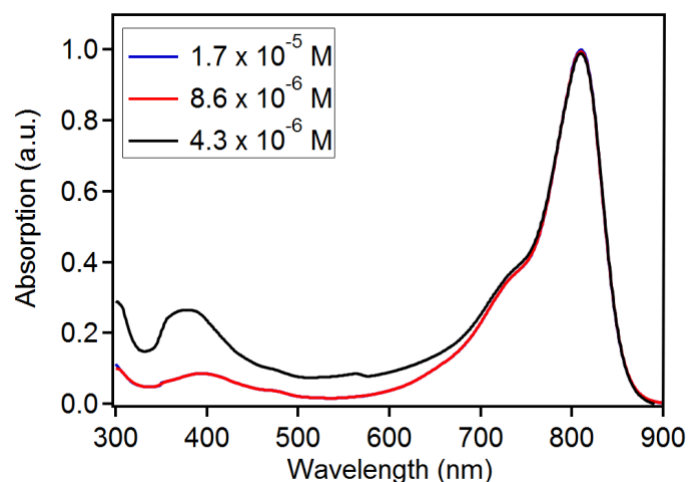

**Figure S24.** Absorption spectrum of varying concentrations of **C5-Cl** in MeCN showing a change in features as concentration changes.

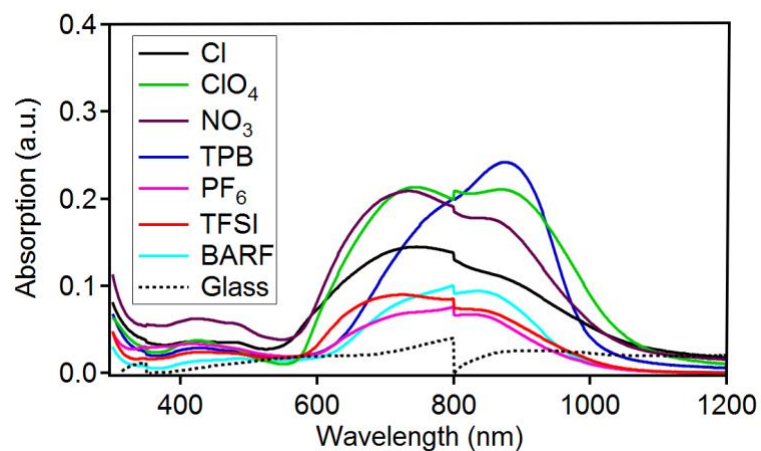

**Figure S25.** Raw film absorption spectrum not normalized. The blank glass absorption spectrum with no dye is shown for comparison.

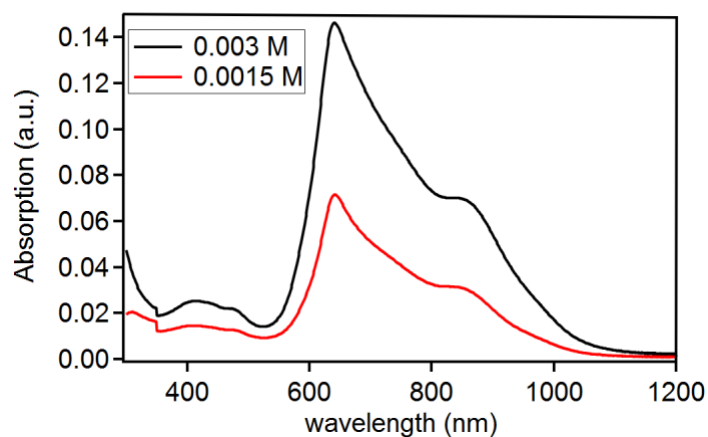

**Figure S26.** Film absorption with **C5-Cl** on glass prepared with varying concentrations of the dye.

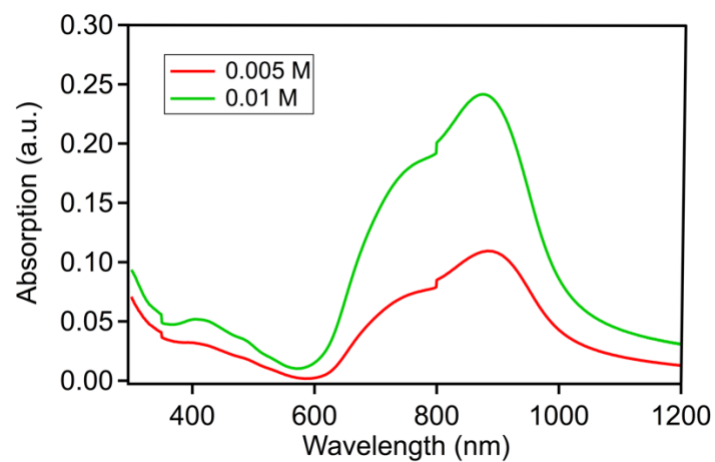

**Figure S27.** Film absorption with **C5-TPB** on glass prepared with varying concentrations of the dye.

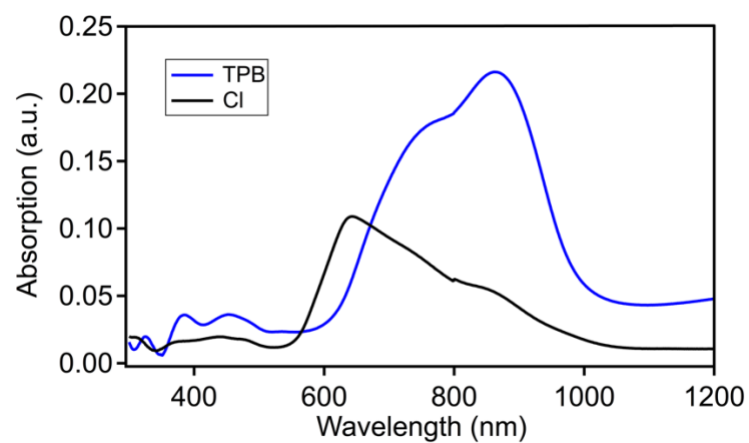

**Figure S28.** Film absorption with **C5-TPB** and **C5-Cl** on fluorine doped tin oxide (FTO).
